# Supplementary material for: Retrieval of Chla Concentrations in Lake Xingkai Using OLCI Images
Source: MDPI journal article supplement (doi:10.3390/rs15153809), 2023-07-31
Supplement: s1 [file s1]

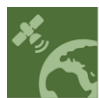

## Supplementary Materials

Table S1. Absorption and backscatter coefficients of pure water in each OLCI band.

| Band Order | Band (nm) | Sentinel 3A        |                       | Sentinel 3B        |                       |
|------------|-----------|--------------------|-----------------------|--------------------|-----------------------|
|            |           | $a_w$ ( $m^{-1}$ ) | $b_{bw}$ ( $m^{-1}$ ) | $a_w$ ( $m^{-1}$ ) | $b_{bp}$ ( $m^{-1}$ ) |
| 1          | 400       | 0.006609           | 0.00335               | 0.006534           | 0.003339              |
| 2          | 412       | 0.004642           | 0.002962              | 0.004634           | 0.002958              |
| 3          | 442       | 0.007082           | 0.002168              | 0.007088           | 0.002167              |
| 4          | 490       | 0.01545            | 0.001407              | 0.01541            | 0.001408              |
| 5          | 510       | 0.03324            | 0.001189              | 0.03315            | 0.001189              |
| 6          | 560       | 0.06231            | 0.000803              | 0.06227            | 0.000804              |
| 7          | 620       | 0.2763             | 0.0005254             | 0.2761             | 0.000526              |
| 8          | 665       | 0.4292             | 0.000393              | 0.4288             | 0.000393              |
| 9          | 674       | 0.4494             | 0.0003723             | 0.449              | 0.000373              |
| 10         | 681       | 0.4733             | 0.0003555             | 0.4726             | 0.000356              |
| 11         | 709       | 0.8117             | 0.0003017             | 0.8079             | 0.000302              |
| 12         | 754       | 2.868              | 0.0002338             | 2.868              | 0.000234              |
| 13         | 761       | 2.868              | 0.0002243             | 2.869              | 0.000225              |
| 14         | 764       | 2.857              | 0.0002206             | 2.858              | 0.000221              |
| 15         | 768       | 2.832              | 0.000217              | 2.833              | 0.000217              |
| 16         | 779       | 2.69               | 0.0002043             | 2.694              | 0.000205              |
| 17         | 865       | 4.634              | 0.0001326             | 4.629              | 0.000133              |
| 18         | 885       | 5.525              | 0.0001213             | 5.515              | 0.000121              |
| 19         | 900       | 6.374              | 0.0001132             | 6.362              | 0.000113              |
| 20         | 940       | 18.25              | 0.00009481            | 18.11              | 0.00009489            |
| 21         | 1012      | 32.07              | 0.00006872            | 32.1               | 0.00006874            |

**Table S2.** Absorption coefficient of ozone (ACO) in different bands used to calculate ozone optical depth. Note that one atm-cm equals DU/1000; DU stands for Dobson Unit (Koontz et al. 2013) [1]. For example, for a columnar amount of ozone of 300 DU, at 615 nm,  $\tau_{O_3}=300/1000*0.1162 = 0.03486$ .

| Band (nm) | ACO    | Band (nm) | ACO    | Band (nm) | ACO (nm) | Band (nm) | ACO (nm) | Band (nm) | ACO (nm) |
|-----------|--------|-----------|--------|-----------|----------|-----------|----------|-----------|----------|
| 380       | 0.0000 | 381       | 0.0000 | 382       | 0.0000   | 383       | 0.0000   | 384       | 0.0000   |
| 385       | 0.0000 | 386       | 0.0000 | 387       | 0.0000   | 388       | 0.0000   | 389       | 0.0000   |
| 390       | 0.0000 | 391       | 0.0000 | 392       | 0.0000   | 393       | 0.0000   | 394       | 0.0000   |
| 395       | 0.0000 | 396       | 0.0000 | 397       | 0.0000   | 398       | 0.0000   | 399       | 0.0000   |
| 400       | 0.0000 | 401       | 0.0000 | 402       | 0.0000   | 403       | 0.0000   | 404       | 0.0000   |
| 405       | 0.0000 | 406       | 0.0000 | 407       | 0.0001   | 408       | 0.0002   | 409       | 0.0002   |
| 410       | 0.0003 | 411       | 0.0003 | 412       | 0.0003   | 413       | 0.0003   | 414       | 0.0003   |
| 415       | 0.0003 | 416       | 0.0004 | 417       | 0.0005   | 418       | 0.0005   | 419       | 0.0005   |
| 420       | 0.0005 | 421       | 0.0006 | 422       | 0.0007   | 423       | 0.0008   | 424       | 0.0010   |
| 425       | 0.0012 | 426       | 0.0013 | 427       | 0.0013   | 428       | 0.0013   | 429       | 0.0012   |
| 430       | 0.0012 | 431       | 0.0013 | 432       | 0.0015   | 433       | 0.0017   | 434       | 0.0017   |
| 435       | 0.0017 | 436       | 0.0017 | 437       | 0.0018   | 438       | 0.0021   | 439       | 0.0024   |
| 440       | 0.0029 | 441       | 0.0033 | 442       | 0.0037   | 443       | 0.0039   | 444       | 0.0040   |
| 445       | 0.0038 | 446       | 0.0036 | 447       | 0.0035   | 448       | 0.0035   | 449       | 0.0038   |
| 450       | 0.0042 | 451       | 0.0045 | 452       | 0.0046   | 453       | 0.0046   | 454       | 0.0046   |
| 455       | 0.0047 | 456       | 0.0052 | 457       | 0.0059   | 458       | 0.0069   | 459       | 0.0078   |
| 460       | 0.0087 | 461       | 0.0095 | 462       | 0.0098   | 463       | 0.0097   | 464       | 0.0092   |

|     |        |     |        |     |        |     |        |     |        |
|-----|--------|-----|--------|-----|--------|-----|--------|-----|--------|
| 465 | 0.0087 | 466 | 0.0084 | 467 | 0.0086 | 468 | 0.0092 | 469 | 0.0096 |
| 470 | 0.0101 | 471 | 0.0104 | 472 | 0.0105 | 473 | 0.0105 | 474 | 0.0108 |
| 475 | 0.0115 | 476 | 0.0127 | 477 | 0.0141 | 478 | 0.0158 | 479 | 0.0174 |
| 480 | 0.0193 | 481 | 0.0206 | 482 | 0.0215 | 483 | 0.0218 | 484 | 0.0213 |
| 485 | 0.0205 | 486 | 0.0200 | 487 | 0.0196 | 488 | 0.0197 | 489 | 0.0203 |
| 490 | 0.0213 | 491 | 0.0219 | 492 | 0.0223 | 493 | 0.0225 | 494 | 0.0230 |
| 495 | 0.0234 | 496 | 0.0244 | 497 | 0.0257 | 498 | 0.0274 | 499 | 0.0295 |
| 500 | 0.0320 | 501 | 0.0346 | 502 | 0.0372 | 503 | 0.0396 | 504 | 0.0414 |
| 505 | 0.0427 | 506 | 0.0431 | 507 | 0.0429 | 508 | 0.0423 | 509 | 0.0415 |
| 510 | 0.0409 | 511 | 0.0405 | 512 | 0.0410 | 513 | 0.0418 | 514 | 0.0428 |
| 515 | 0.0437 | 516 | 0.0446 | 517 | 0.0455 | 518 | 0.0463 | 519 | 0.0471 |
| 520 | 0.0481 | 521 | 0.0496 | 522 | 0.0511 | 523 | 0.0531 | 524 | 0.0554 |
| 525 | 0.0580 | 526 | 0.0605 | 527 | 0.0633 | 528 | 0.0659 | 529 | 0.0684 |
| 530 | 0.0706 | 531 | 0.0725 | 532 | 0.0740 | 533 | 0.0749 | 534 | 0.0754 |
| 535 | 0.0755 | 536 | 0.0753 | 537 | 0.0753 | 538 | 0.0757 | 539 | 0.0764 |
| 540 | 0.0774 | 541 | 0.0787 | 542 | 0.0803 | 543 | 0.0819 | 544 | 0.0833 |
| 545 | 0.0846 | 546 | 0.0856 | 547 | 0.0866 | 548 | 0.0875 | 549 | 0.0882 |
| 550 | 0.0890 | 551 | 0.0899 | 552 | 0.0908 | 553 | 0.0918 | 554 | 0.0931 |
| 555 | 0.0944 | 556 | 0.0962 | 557 | 0.0981 | 558 | 0.1002 | 559 | 0.1027 |
| 560 | 0.1052 | 561 | 0.1078 | 562 | 0.1104 | 563 | 0.1128 | 564 | 0.1148 |
| 565 | 0.1166 | 566 | 0.1184 | 567 | 0.1199 | 568 | 0.1213 | 569 | 0.1229 |
| 570 | 0.1244 | 571 | 0.1257 | 572 | 0.1268 | 573 | 0.1275 | 574 | 0.1279 |
| 575 | 0.1278 | 576 | 0.1273 | 577 | 0.1264 | 578 | 0.1254 | 579 | 0.1243 |
| 580 | 0.1231 | 581 | 0.1219 | 582 | 0.1208 | 583 | 0.1197 | 584 | 0.1190 |
| 585 | 0.1184 | 586 | 0.1180 | 587 | 0.1179 | 588 | 0.1178 | 589 | 0.1180 |
| 590 | 0.1185 | 591 | 0.1196 | 592 | 0.1208 | 593 | 0.1226 | 594 | 0.1248 |
| 595 | 0.1270 | 596 | 0.1295 | 597 | 0.1318 | 598 | 0.1341 | 599 | 0.1360 |
| 600 | 0.1375 | 601 | 0.1384 | 602 | 0.1390 | 603 | 0.1388 | 604 | 0.1382 |
| 605 | 0.1371 | 606 | 0.1356 | 607 | 0.1337 | 608 | 0.1317 | 609 | 0.1294 |
| 610 | 0.1271 | 611 | 0.1248 | 612 | 0.1224 | 613 | 0.1203 | 614 | 0.1181 |
| 615 | 0.1162 | 616 | 0.1142 | 617 | 0.1124 | 618 | 0.1108 | 619 | 0.1092 |
| 620 | 0.1078 | 621 | 0.1065 | 622 | 0.1052 | 623 | 0.1039 | 624 | 0.1027 |
| 625 | 0.1014 | 626 | 0.1000 | 627 | 0.0987 | 628 | 0.0973 | 629 | 0.0957 |
| 630 | 0.0943 | 631 | 0.0929 | 632 | 0.0916 | 633 | 0.0901 | 634 | 0.0886 |
| 635 | 0.0870 | 636 | 0.0855 | 637 | 0.0839 | 638 | 0.0823 | 639 | 0.0807 |
| 640 | 0.0790 | 641 | 0.0775 | 642 | 0.0761 | 643 | 0.0747 | 644 | 0.0734 |
| 645 | 0.0720 | 646 | 0.0708 | 647 | 0.0696 | 648 | 0.0683 | 649 | 0.0673 |
| 650 | 0.0662 | 651 | 0.0652 | 652 | 0.0641 | 653 | 0.0630 | 654 | 0.0619 |
| 655 | 0.0608 | 656 | 0.0597 | 657 | 0.0586 | 658 | 0.0575 | 659 | 0.0565 |
| 660 | 0.0555 | 661 | 0.0546 | 662 | 0.0536 | 663 | 0.0526 | 664 | 0.0516 |
| 665 | 0.0505 | 666 | 0.0494 | 667 | 0.0482 | 668 | 0.0471 | 669 | 0.0460 |
| 670 | 0.0450 | 671 | 0.0440 | 672 | 0.0429 | 673 | 0.0419 | 674 | 0.0409 |
| 675 | 0.0401 | 676 | 0.0392 | 677 | 0.0383 | 678 | 0.0375 | 679 | 0.0368 |
| 680 | 0.0361 | 681 | 0.0355 | 682 | 0.0350 | 683 | 0.0345 | 684 | 0.0339 |
| 685 | 0.0333 | 686 | 0.0327 | 687 | 0.0320 | 688 | 0.0311 | 689 | 0.0303 |
| 690 | 0.0295 | 691 | 0.0287 | 692 | 0.0279 | 693 | 0.0273 | 694 | 0.0265 |
| 695 | 0.0258 | 696 | 0.0251 | 697 | 0.0244 | 698 | 0.0237 | 699 | 0.0232 |

|     |        |     |        |     |        |     |        |     |        |
|-----|--------|-----|--------|-----|--------|-----|--------|-----|--------|
| 700 | 0.0226 | 701 | 0.0221 | 702 | 0.0217 | 703 | 0.0212 | 704 | 0.0208 |
| 705 | 0.0205 | 706 | 0.0202 | 707 | 0.0199 | 708 | 0.0196 | 709 | 0.0193 |
| 710 | 0.0191 | 711 | 0.0189 | 712 | 0.0187 | 713 | 0.0185 | 714 | 0.0185 |
| 715 | 0.0183 | 716 | 0.0181 | 717 | 0.0177 | 718 | 0.0173 | 719 | 0.0168 |
| 720 | 0.0162 | 721 | 0.0156 | 722 | 0.0151 | 723 | 0.0147 | 724 | 0.0143 |
| 725 | 0.0140 | 726 | 0.0136 | 727 | 0.0134 | 728 | 0.0130 | 729 | 0.0126 |
| 730 | 0.0123 | 731 | 0.0120 | 732 | 0.0118 | 733 | 0.0116 | 734 | 0.0115 |
| 735 | 0.0114 | 736 | 0.0114 | 737 | 0.0113 | 738 | 0.0112 | 739 | 0.0112 |
| 740 | 0.0112 | 741 | 0.0113 | 742 | 0.0115 | 743 | 0.0116 | 744 | 0.0117 |
| 745 | 0.0118 | 746 | 0.0120 | 747 | 0.0119 | 748 | 0.0118 | 749 | 0.0116 |
| 750 | 0.0111 | 751 | 0.0106 | 752 | 0.0101 | 753 | 0.0096 | 754 | 0.0090 |
| 755 | 0.0086 | 756 | 0.0082 | 757 | 0.0079 | 758 | 0.0077 | 759 | 0.0075 |
| 760 | 0.0073 | 761 | 0.0072 | 762 | 0.0070 | 763 | 0.0070 | 764 | 0.0070 |
| 765 | 0.0069 | 766 | 0.0068 | 767 | 0.0067 | 768 | 0.0067 | 769 | 0.0068 |
| 770 | 0.0068 | 771 | 0.0069 | 772 | 0.0071 | 773 | 0.0072 | 774 | 0.0075 |
| 775 | 0.0079 | 776 | 0.0081 | 777 | 0.0083 | 778 | 0.0084 | 779 | 0.0085 |
| 780 | 0.0084 | 781 | 0.0082 | 782 | 0.0079 | 783 | 0.0075 | 784 | 0.0071 |
| 785 | 0.0067 | 786 | 0.0063 | 787 | 0.0061 | 788 | 0.0058 | 789 | 0.0056 |
| 790 | 0.0054 | 791 | 0.0052 | 792 | 0.0049 | 793 | 0.0047 | 794 | 0.0046 |
| 795 | 0.0044 | 796 | 0.0043 | 797 | 0.0042 | 798 | 0.0042 | 799 | 0.0041 |
| 800 | 0.0040 | 801 | 0.0040 | 802 | 0.0040 | 803 | 0.0039 | 804 | 0.0040 |
| 805 | 0.0040 | 806 | 0.0041 | 807 | 0.0042 | 808 | 0.0044 | 809 | 0.0046 |
| 810 | 0.0048 | 811 | 0.0050 | 812 | 0.0052 | 813 | 0.0054 | 814 | 0.0056 |
| 815 | 0.0057 | 816 | 0.0057 | 817 | 0.0057 | 818 | 0.0056 | 819 | 0.0055 |
| 820 | 0.0052 | 821 | 0.0049 | 822 | 0.0046 | 823 | 0.0043 | 824 | 0.0040 |
| 825 | 0.0037 | 826 | 0.0034 | 827 | 0.0031 | 828 | 0.0029 | 829 | 0.0027 |
| 830 | 0.0025 | 831 | 0.0024 | 832 | 0.0023 | 833 | 0.0022 | 834 | 0.0021 |
| 835 | 0.0021 | 836 | 0.0020 | 837 | 0.0020 | 838 | 0.0020 | 839 | 0.0020 |
| 840 | 0.0020 | 841 | 0.0020 | 842 | 0.0021 | 843 | 0.0021 | 844 | 0.0022 |
| 845 | 0.0023 | 846 | 0.0024 | 847 | 0.0026 | 848 | 0.0028 | 849 | 0.0030 |
| 850 | 0.0032 | 851 | 0.0035 | 852 | 0.0037 | 853 | 0.0038 | 854 | 0.0038 |
| 855 | 0.0037 | 856 | 0.0036 | 857 | 0.0035 | 858 | 0.0033 | 859 | 0.0032 |
| 860 | 0.0029 | 861 | 0.0027 | 862 | 0.0025 | 863 | 0.0023 | 864 | 0.0021 |
| 865 | 0.0019 | 866 | 0.0017 | 867 | 0.0016 | 868 | 0.0015 | 869 | 0.0014 |
| 870 | 0.0013 | 871 | 0.0013 | 872 | 0.0012 | 873 | 0.0011 | 874 | 0.0011 |
| 875 | 0.0011 | 876 | 0.0010 | 877 | 0.0010 | 878 | 0.0010 | 879 | 0.0010 |
| 880 | 0.0011 | 881 | 0.0011 | 882 | 0.0011 | 883 | 0.0011 | 884 | 0.0012 |
| 885 | 0.0012 | 886 | 0.0013 | 887 | 0.0013 | 888 | 0.0013 | 889 | 0.0014 |
| 890 | 0.0014 | 891 | 0.0013 | 892 | 0.0013 | 893 | 0.0014 | 894 | 0.0014 |
| 895 | 0.0015 | 896 | 0.0016 | 897 | 0.0016 | 898 | 0.0017 | 899 | 0.0017 |
| 900 | 0.0016 | 901 | 0.0015 | 902 | 0.0014 | 903 | 0.0014 | 904 | 0.0013 |
| 905 | 0.0012 | 906 | 0.0011 | 907 | 0.0010 | 908 | 0.0009 | 909 | 0.0009 |
| 910 | 0.0008 | 911 | 0.0007 | 912 | 0.0007 | 913 | 0.0006 | 914 | 0.0006 |
| 915 | 0.0005 | 916 | 0.0005 | 917 | 0.0005 | 918 | 0.0005 | 919 | 0.0005 |
| 920 | 0.0005 | 921 | 0.0004 | 922 | 0.0004 | 923 | 0.0004 | 924 | 0.0004 |
| 925 | 0.0004 | 926 | 0.0004 | 927 | 0.0004 | 928 | 0.0004 | 929 | 0.0004 |
| 930 | 0.0004 | 931 | 0.0004 | 932 | 0.0004 | 933 | 0.0004 | 934 | 0.0004 |

|     |        |     |        |     |        |     |        |     |        |
|-----|--------|-----|--------|-----|--------|-----|--------|-----|--------|
| 935 | 0.0005 | 936 | 0.0005 | 937 | 0.0005 | 938 | 0.0006 | 939 | 0.0007 |
| 940 | 0.0008 | 941 | 0.0009 | 942 | 0.0010 | 943 | 0.0011 | 944 | 0.0011 |
| 945 | 0.0011 | 946 | 0.0010 | 947 | 0.0009 | 948 | 0.0008 | 949 | 0.0007 |
| 950 | 0.0007 | 951 | 0.0006 | 952 | 0.0005 | 953 | 0.0005 | 954 | 0.0004 |
| 955 | 0.0004 | 956 | 0.0004 | 957 | 0.0004 | 958 | 0.0003 | 959 | 0.0003 |
| 960 | 0.0003 | 961 | 0.0000 | 962 | 0.0000 | 963 | 0.0000 | 964 | 0.0000 |
| 965 | 0.0000 | 966 | 0.0000 | 967 | 0.0000 | 968 | 0.0000 | 969 | 0.0000 |
| 970 | 0.0000 | 971 | 0.0000 | 972 | 0.0000 | 973 | 0.0000 | 974 | 0.0000 |
| 975 | 0.0000 |     |        |     |        |     |        |     |        |

**Table S3.** The atmospheric correction performance of Rud in Lake Xingkai in different bands with the C2RCC algorithm as a comparison in the bracket.

| Bands (nm) | MAPD (%)      | MND (%)         | RMSD (sr <sup>-1</sup> ) |
|------------|---------------|-----------------|--------------------------|
| 560        | 16.13 (20.73) | -9.49 (-17.95)  | 0.0068 (0.0089)          |
| 665        | 17.43 (30.08) | -10.15 (-29.17) | 0.0069 (0.0113)          |
| 681        | 18.13 (32.20) | -10.86 (-31.63) | 0.0071 (0.0119)          |
| 709        | 14.90 (17.62) | -9.85 (-12.38)  | 0.0059 (0.0067)          |
| 754        | 17.16 (18.54) | -3.38 (-9.76)   | 0.00255 (0.00310)        |
| 885        | 14.90 (27.80) | +2.93 (-4.94)   | 0.00165 (0.00178)        |

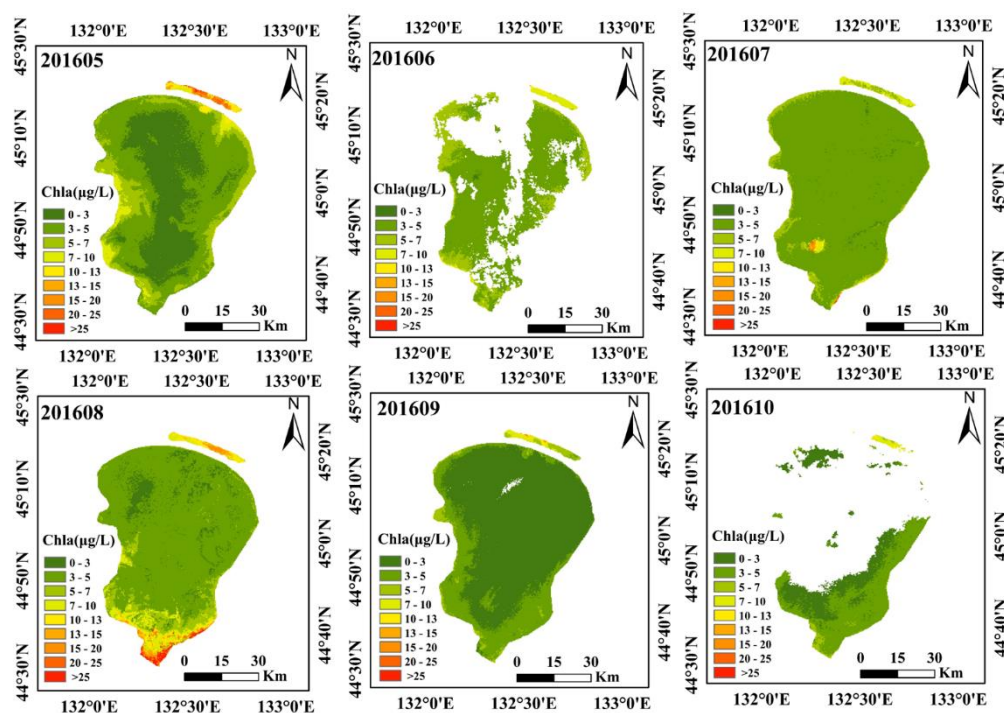

Figure S1. Monthly mean Chla distributions in Lake Xingkai in 2016.

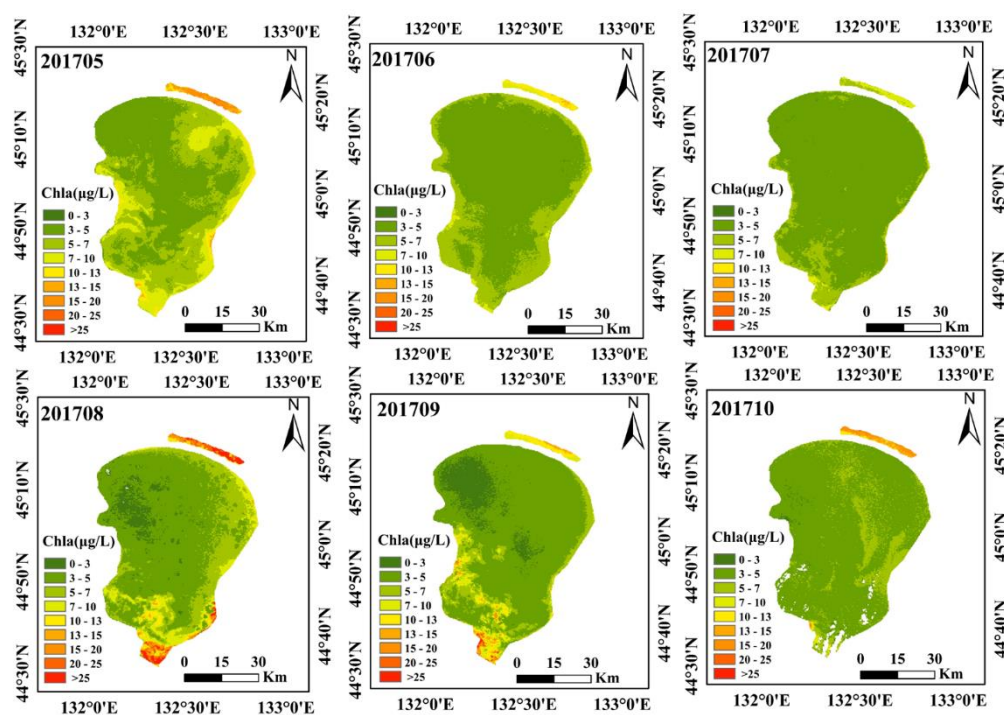

Figure S2. Monthly mean Chla distributions in Lake Xingkai in 2017.

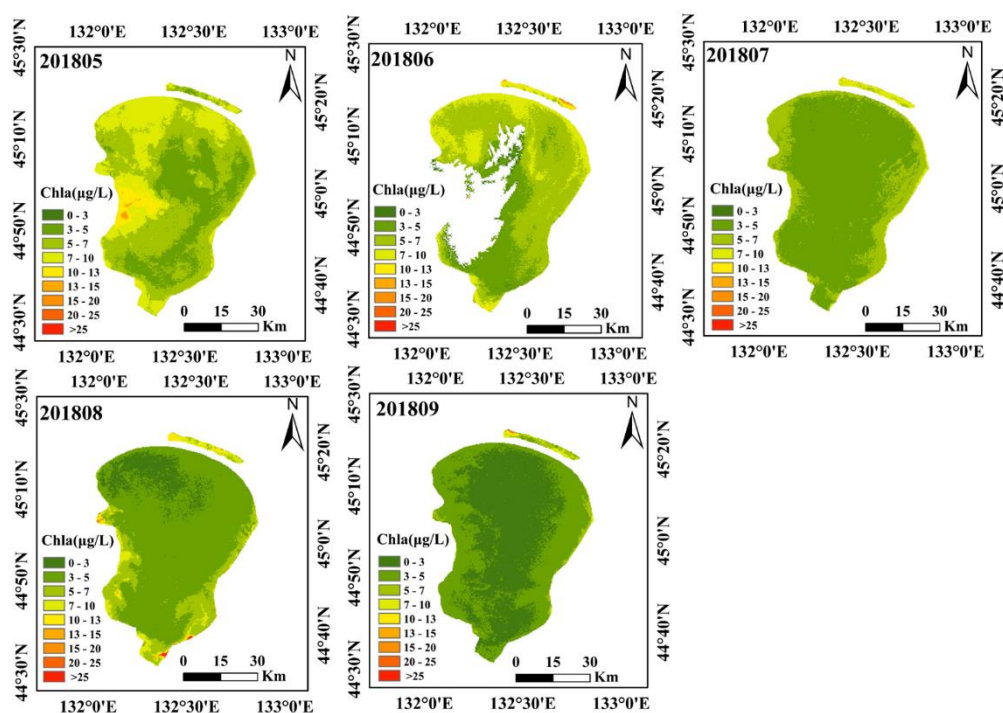

Figure S3. Monthly mean Chla distributions in Lake Xingkai in 2018.

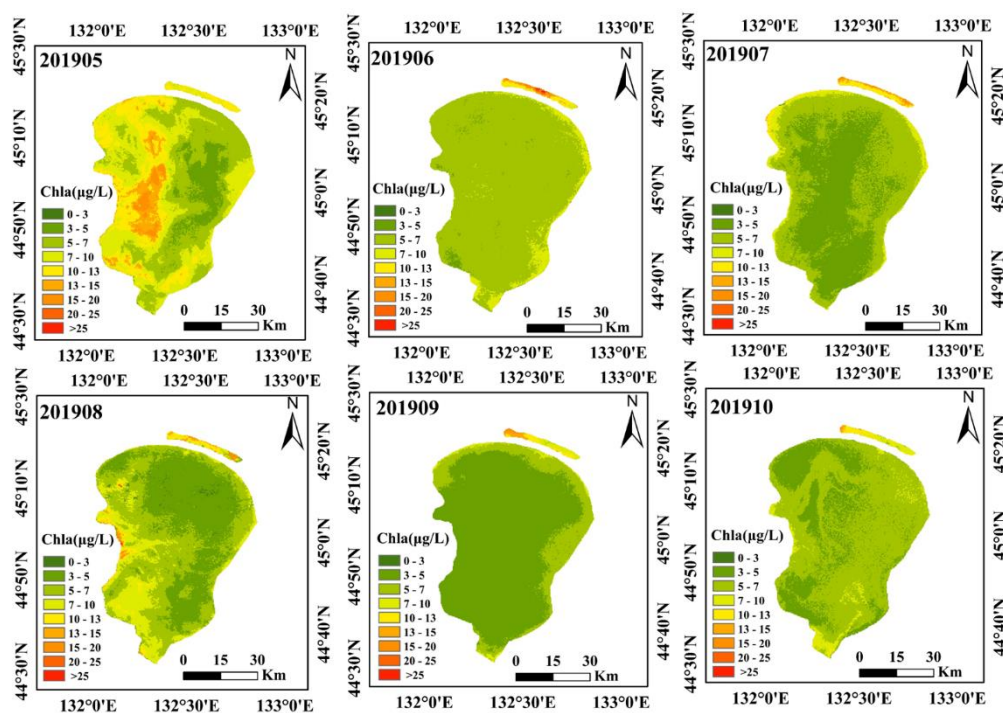

Figure S4. Monthly mean Chla distributions in Lake Xingkai in 2019.

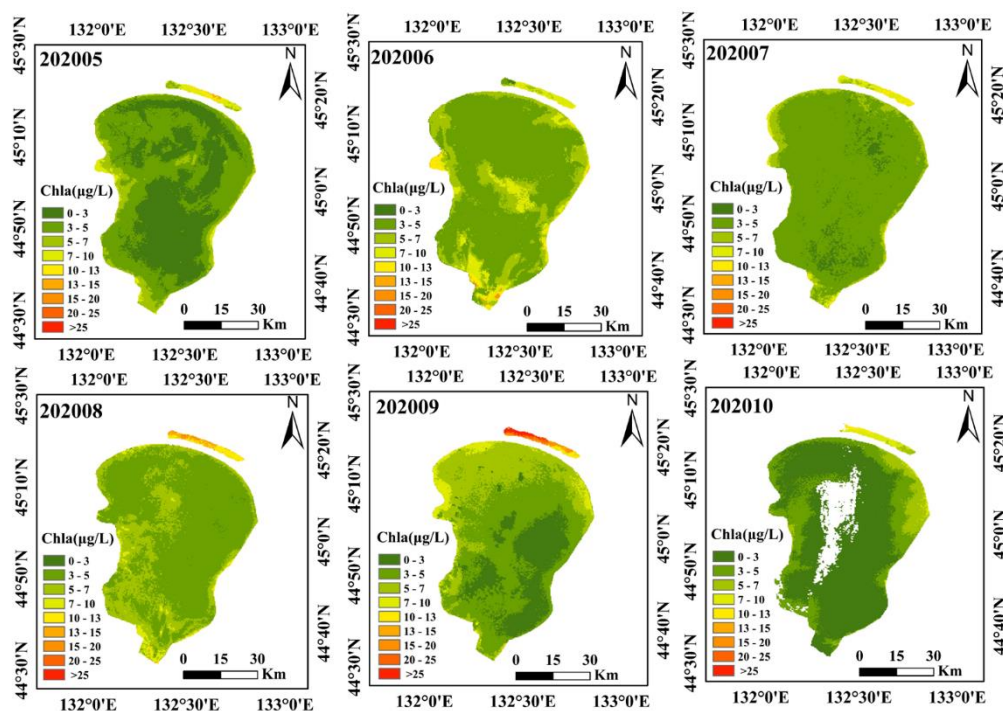

Figure S5. Monthly mean Chla distributions in Lake Xingkai in 2020.

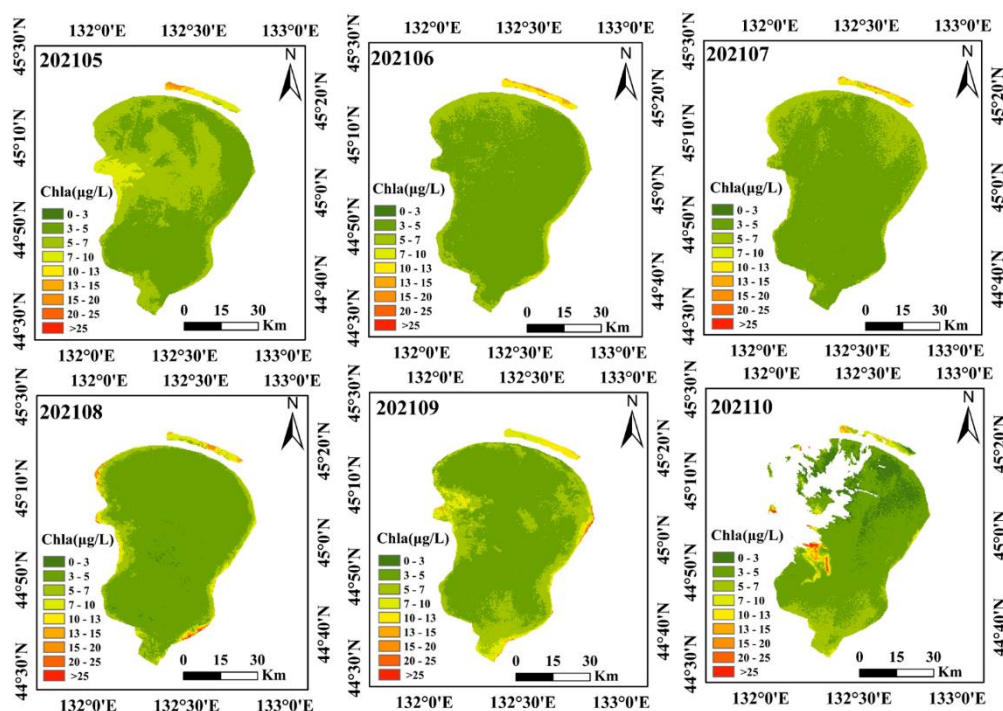

Figure S6. Monthly mean Chla distributions in Lake Xingkai in 2021.

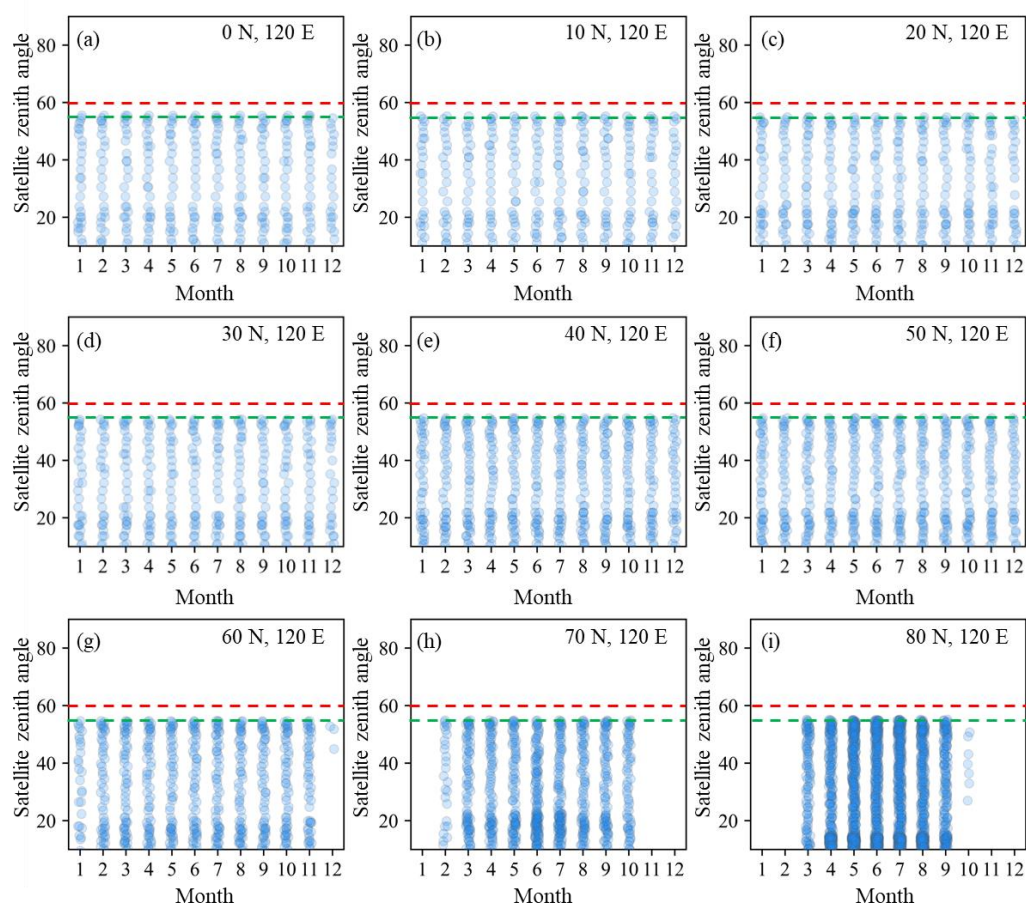

**Figure S7.** Satellite angle distribution in different months for regions at different latitudes. The green line is 55° and the red line is 60°.

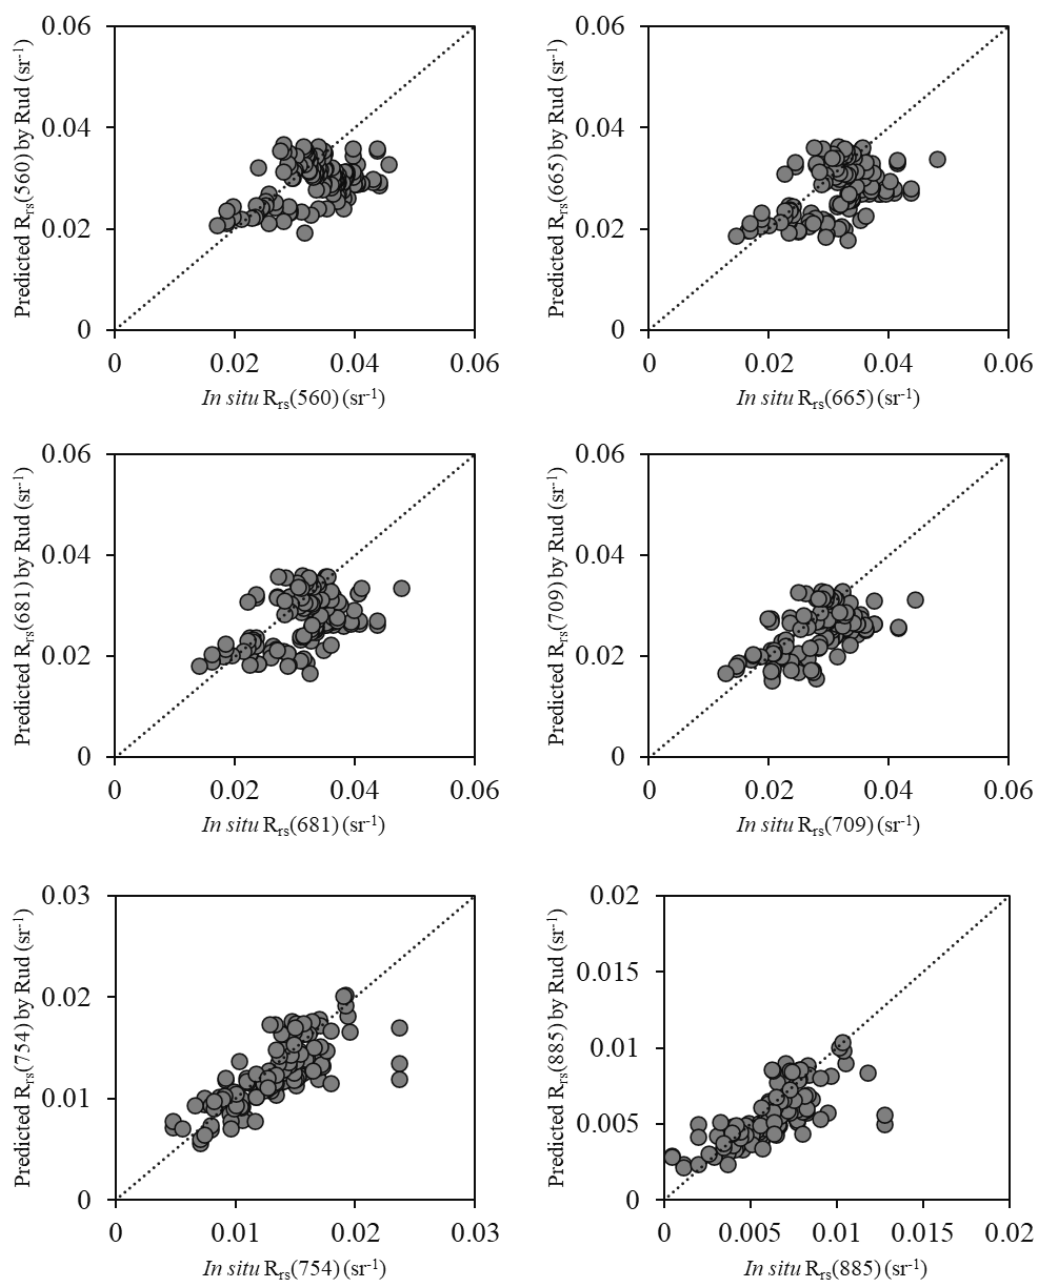

**Figure S8.** The comparison of *in situ*  $R_{rs}(\lambda)$  and predicted by Rud for 560, 665, 681, 709, 754, and 885 nm.

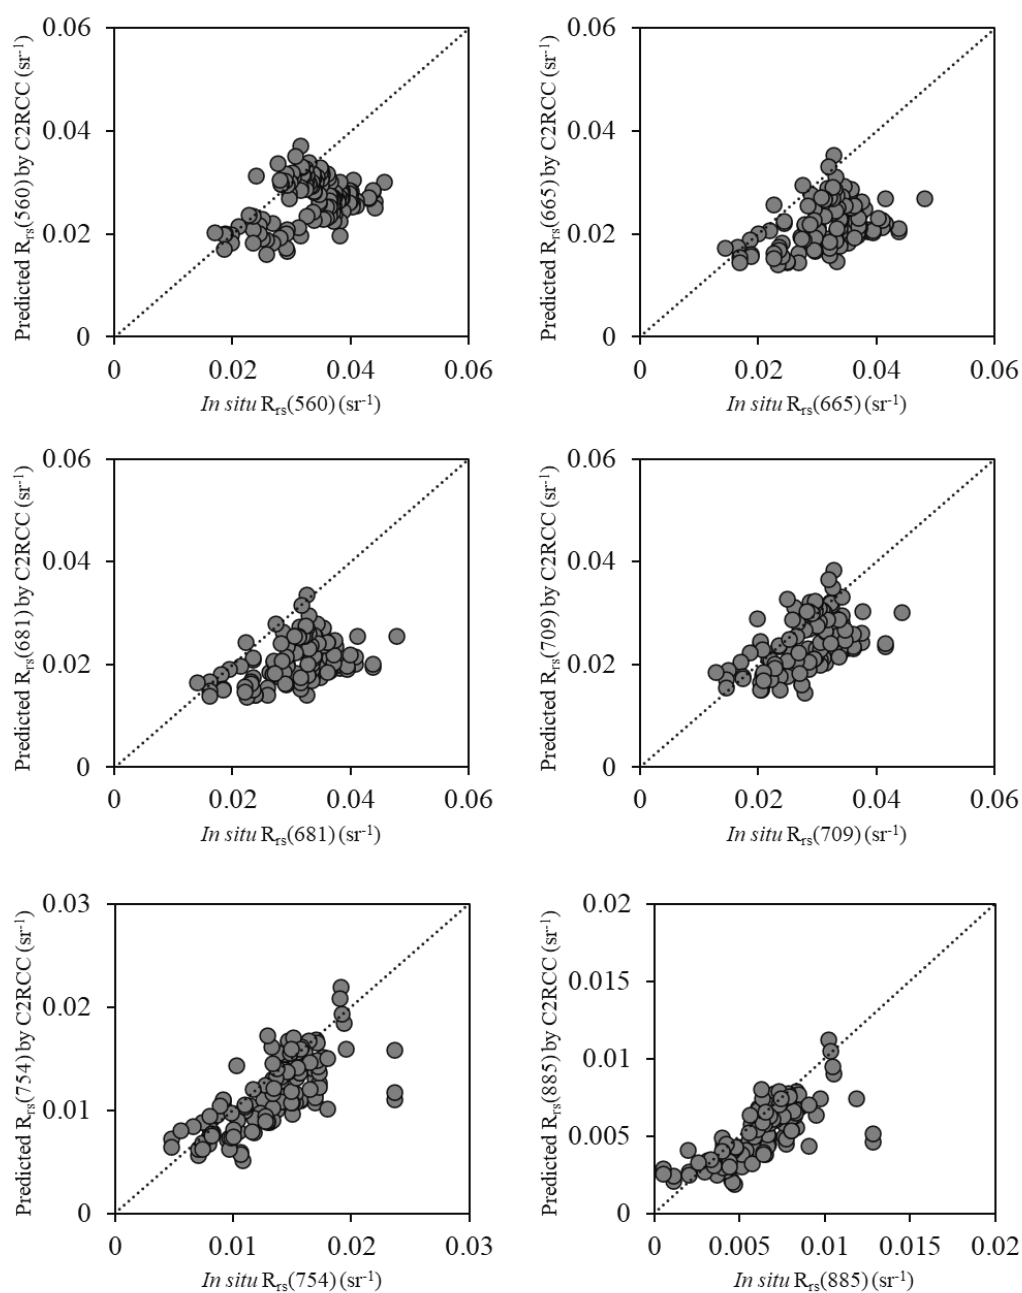

**Figure S9.** The comparison of *in situ*  $R_{rs}(\lambda)$  and predicted by C2RCC for 560, 665, 681, 709, 754, and 885 nm.

## References

1. Koontz, A.; Flynn, C.; Hodges, G.; Michalsky, J.; Barnard, J. *Aerosol Optical Depth Value-Added Product*; US Department of Energy: Washington, DC, USA, 2013; Volume 32. <https://doi.org/10.2172/1092419>.
